# Supplementary material
Source: Springer Nature journal article supplement (https://www.springermedizin.de/resource/supplementary/13046_2012_561_MOESM2_ESM.pdf/9662452)

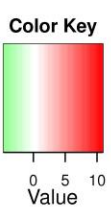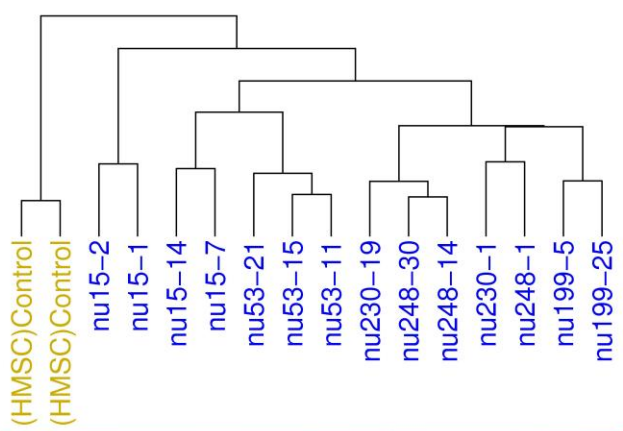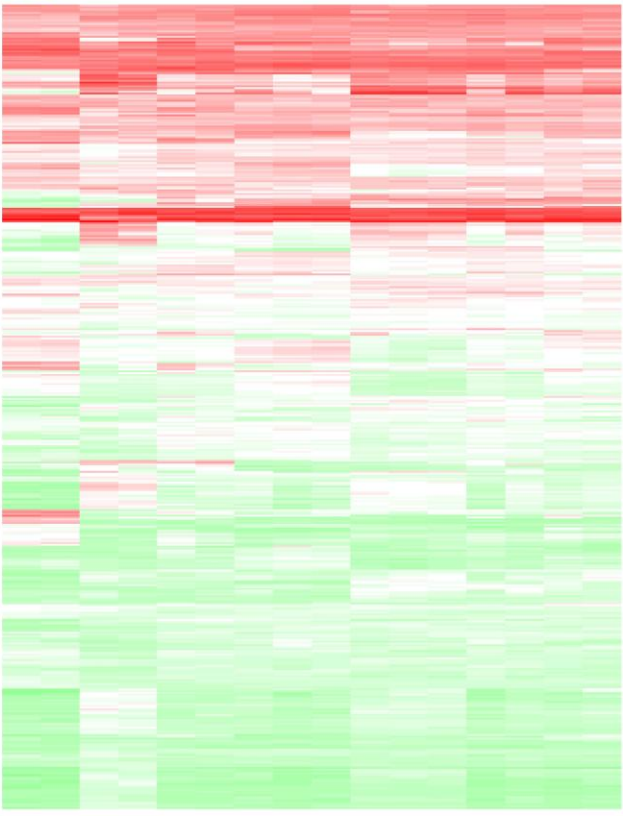

Xenograft passage samples and controls

Supplement: MOESM2 [file 9662452]
